# Supplementary material for: The Dimeric Peptide (KKYRYHLKPF)2K Shows Broad-Spectrum Antiviral Activity by Inhibiting Different Steps of Chikungunya and Zika Virus Infection
Source: MDPI journal article supplement (doi:10.3390/v15051168), 2023-05-14

## **The Dimeric Peptide (KKYRYHLKPF)<sub>2</sub>K Shows Broad-spectrum Antiviral Activity by Inhibiting Different Steps of Chikungunya and Zika Virus Infection**

Gabriela Miranda Ayusso <sup>1†</sup>, Maria Letícia Duarte Lima <sup>1†</sup>, Paulo Ricardo da Silva Sanches <sup>2†</sup>, Igor Andrade Santos <sup>3</sup>, Daniel Oliveira Silva Martins <sup>1,3</sup>, Pâmela Jóyce Previdelli da Conceição <sup>1</sup>, Tamara Carvalho <sup>1</sup>, Vivaldo Gomes da Costa <sup>1</sup>, Cíntia Bittar <sup>1,4</sup>, Andres Merits <sup>5</sup>, Norival Alves Santos-Filho <sup>6</sup>, Eduardo Maffud Cilli <sup>6</sup>, Ana Carolina Gomes Jardim <sup>1,3</sup>, Marília de Freitas Calmon <sup>1</sup>, Paula Rahal <sup>1\*</sup>

<sup>1</sup>Universidade Estadual Paulista (UNESP), Instituto de Biociências, Letras e Ciências Exatas, São José do Rio Preto 15054-000, SP, Brazil.

<sup>2</sup>Universidade Estadual Paulista (UNESP), Faculdade de Ciências Farmacêuticas, Araraquara 14800-903, SP, Brazil.

<sup>3</sup> Universidade Federal de Uberlândia (UFU), Uberlândia 38408-100, MG, Brazil.

<sup>4</sup>The Rockefeller University, New York 10065, NY, USA.

<sup>5</sup> Institute of Technology, University of Tartu, Nooruse 1, 50411 Tartu, Estonia.

<sup>6</sup> Universidade Estadual Paulista (UNESP), Instituto de Química, Araraquara 14800-060, SP, Brazil.

<sup>†</sup>These authors contributed equally to this work.

**\* Corresponding author**

***E-mail address:*** p.rahal@unesp.br

## S1. Determination of the maximum non-toxic concentration (MNTC) in BHK-21 and Vero CCL-81 cells

The cytotoxicity of the (pBthTX-I)<sub>2</sub>K peptide was analyzed in BHK-21 cells at 24 hours or 48 hours in Vero cells by the 3-(4,5-dimethylthiazol-2-yl)-2,5-diphenyltetrazolium bromide (MTT) assay. The peptide was tested at concentrations of 1.6, 3.1, 6.3, 12.5, 25, 50 and 100  $\mu$ M in BHK-21 and Vero cells. The maximum non-toxic concentration (MNTC), expressed in  $\mu$ M, was defined as the highest concentration of the peptide that maintained at least 80% of the cells viable within 24 hours or 48 hours. Considering the arbitrary threshold of 80% cell viability, the (pBthTX-I)<sub>2</sub>K peptide reached its MNTC in BHK-21 cells at 12.5  $\mu$ M at 24 hours (Figure S1A) and 25  $\mu$ M in Vero cells at 48 hours (Figure S1B).

**Figure S1.** Cytotoxic effect of the (pBthTX-I)<sub>2</sub>K peptide in (A) BHK-21 cells and (B) Vero cells. Black lines represent the arbitrary limit of 80% cell viability. VC: vehicle control (sterile water). Error bars represents  $\pm$  standard deviation (SD).

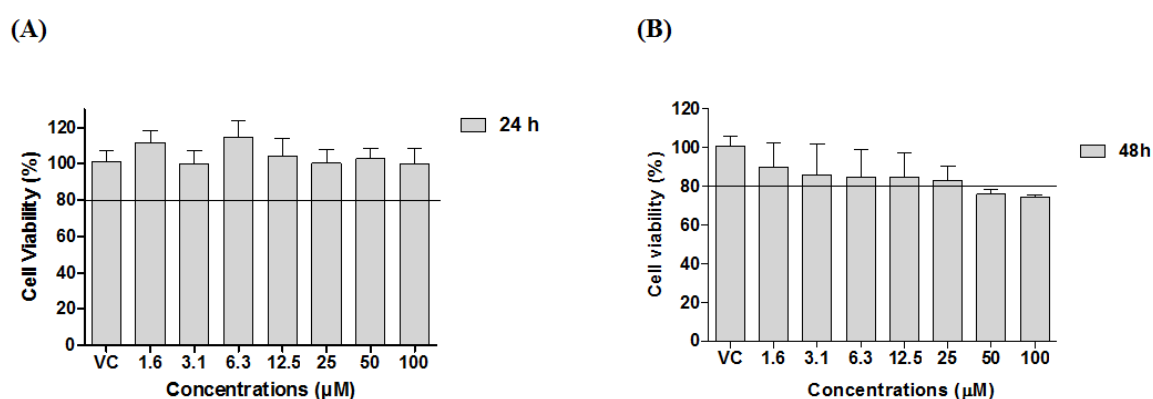

Supplement: s1 [file s1]
